# Supplementary material for: Trends of injury mortality during the COVID-19 period in Guangdong, China: a population-based retrospective analysis
Source: PubMed Central journal article supplement — BMJ Open. 2021 Jun 2;11(6):e045317. doi: 10.1136/bmjopen-2020-045317 (PMC8182756; doi:10.1136/bmjopen-2020-045317), 2021-06-02
Supplement: bmjopen-2020-045317supp001.pdf [file bmjopen-2020-045317supp001.pdf]

**E-Table 1. Mortality for injury causes in Guangdong, China between the Covid-19 Outbreak and Control Period in 2019 in different age groups in male and female population.**

| Sex group                     | Age group | Transport injuries | Poisonings | Falls  | Fire, heat, and hot substances | Drowning | Self-harm             | Interpersonal violence | All-cause of injury |
|-------------------------------|-----------|--------------------|------------|--------|--------------------------------|----------|-----------------------|------------------------|---------------------|
| <b>Control Period in 2019</b> |           |                    |            |        |                                |          |                       |                        |                     |
| Male                          | 0-14      | 2.12               | 0.41       | 1.18   | 0.25                           | 2.72     | 0.53<br>(10-14 years) | 0.1                    | 9.57                |
|                               | 15-59     | 8.7                | 1.69       | 3.75   | 0.17                           | 1.82     | 4.89                  | 0.33                   | 25.35               |
|                               | 60-69     | 31.36              | 2.42       | 20.74  | 0.87                           | 4.16     | 9                     | 0.31                   | 79.04               |
|                               | 70-79     | 25.61              | 1.56       | 41.12  | 1.74                           | 4.04     | 7.89                  | 0.28                   | 98.13               |
|                               | 80+       | 37.36              | 4.67       | 225.8  | 2.57                           | 7.71     | 13.78                 | 0.7                    | 359.13              |
|                               | Total     | 9.87               | 1.54       | 9.02   | 0.32                           | 2.29     | 4.51                  | 0.29                   | 33.33               |
| Female                        | 0-14      | 1.74               | 0.63       | 1.11   | 0.12                           | 1.66     | 0.76<br>(10-14 years) | 0.27                   | 8.71                |
|                               | 15-59     | 3.08               | 0.72       | 1.02   | 0.09                           | 0.73     | 2.63                  | 0.28                   | 9.57                |
|                               | 60-69     | 12.77              | 1          | 8.09   | 0.13                           | 3.48     | 7.75                  | 0.53                   | 38.9                |
|                               | 70-79     | 10.13              | 1.6        | 31.11  | 0.44                           | 3.91     | 6.84                  | 0.27                   | 65.77               |
|                               | 80+       | 16.73              | 1.61       | 285.89 | 1.61                           | 10.14    | 8.37                  | 0.16                   | 418.94              |
|                               | Total     | 4.06               | 0.78       | 9.64   | 0.15                           | 1.41     | 2.87                  | 0.29                   | 23.47               |
| General population            | 0-14      | 1.95               | 0.5        | 1.15   | 0.19                           | 2.25     | 0.63<br>(10-14 years) | 0.17                   | 9.19                |
|                               | 15-59     | 6.02               | 1.23       | 2.45   | 0.13                           | 1.3      | 3.81                  | 0.31                   | 17.82               |
|                               | 60-69     | 22.41              | 1.74       | 14.65  | 0.52                           | 3.83     | 8.4                   | 0.42                   | 59.71               |
|                               | 70-79     | 17.75              | 1.58       | 36.03  | 1.08                           | 3.97     | 7.36                  | 0.27                   | 81.69               |
|                               | 80+       | 25.15              | 2.86       | 261.38 | 2                              | 9.14     | 10.57                 | 0.38                   | 394.54              |

|                                 | Total | 7.11  | 1.18 | 9.31   | 0.24 | 1.87 | 3.73                  | 0.29 | 28.65  |
|---------------------------------|-------|-------|------|--------|------|------|-----------------------|------|--------|
| <b>Covid-19 Outbreak period</b> |       |       |      |        |      |      |                       |      |        |
| Male                            | 0-14  | 1.44  | 0.25 | 1.02   | 0.08 | 2.2  | 1.32<br>(10-14 years) | 0.15 | 7.42   |
|                                 | 15-59 | 5.96  | 1.52 | 3.12   | 0.09 | 1.22 | 3.7                   | 0.15 | 18.76  |
|                                 | 60-69 | 20.11 | 2.5  | 15.01  | 0.5  | 2.25 | 7.2                   | 0.2  | 55.74  |
|                                 | 70-79 | 27.52 | 1.55 | 43.9   | 1.03 | 2.37 | 9.58                  | 0.52 | 100.79 |
|                                 | 80+   | 32.25 | 4.36 | 238.11 | 3.39 | 6.55 | 7.76                  | 0.73 | 361.04 |
|                                 | Total | 7.2   | 1.4  | 8.23   | 0.19 | 1.58 | 3.6                   | 0.17 | 26.81  |
| Female                          | 0-14  | 1.11  | 0.41 | 1.02   | 0.11 | 0.74 | 1.73<br>(10-14 years) | 0.14 | 5.48   |
|                                 | 15-59 | 1.96  | 0.57 | 0.92   | 0.06 | 0.42 | 2.12                  | 0.15 | 7.07   |
|                                 | 60-69 | 7.24  | 0.86 | 6.32   | 0.2  | 1.72 | 5.01                  | 0.25 | 25.05  |
|                                 | 70-79 | 9.88  | 1.23 | 32.19  | 0.66 | 3.89 | 7.69                  | 0.19 | 67.42  |
|                                 | 80+   | 11.19 | 3.24 | 266.24 | 2.11 | 5.84 | 8.44                  | 0.16 | 390.2  |
|                                 | Total | 2.73  | 0.65 | 8.68   | 0.15 | 0.83 | 2.43                  | 0.16 | 19.35  |
| General population              | 0-14  | 1.29  | 0.32 | 1.02   | 0.09 | 1.53 | 1.50<br>(10-14 years) | 0.14 | 6.54   |
|                                 | 15-59 | 4.05  | 1.07 | 2.07   | 0.07 | 0.84 | 2.95                  | 0.15 | 13.19  |
|                                 | 60-69 | 13.71 | 1.69 | 10.69  | 0.35 | 1.99 | 6.11                  | 0.23 | 40.48  |
|                                 | 70-79 | 18.34 | 1.38 | 37.81  | 0.84 | 3.16 | 8.6                   | 0.35 | 83.42  |
|                                 | 80+   | 19.63 | 3.69 | 254.96 | 2.62 | 6.12 | 8.17                  | 0.39 | 378.6  |
|                                 | Total | 5.06  | 1.04 | 8.45   | 0.17 | 1.23 | 3.04                  | 0.16 | 23.24  |

**E-Table 2. Numbers for injury causes in Guangdong, China between the Onset of the COVID-19 outbreak and control Period in 2019.**

| Injury subtypes                   | Study period<br>(No.) | Control period<br>(No.) |
|-----------------------------------|-----------------------|-------------------------|
| All cause of injury               | 12858                 | 15988                   |
| Transport injuries                | 2871                  | 3978                    |
| Poisonings                        | 591                   | 667                     |
| Falls                             | 4792                  | 5209                    |
| Fire, heat, and hot<br>substances | 97                    | 134                     |
| Drowning                          | 695                   | 1053                    |
| Self-harm                         | 1725                  | 2093                    |
| Interpersonal violence            | 93                    | 162                     |

**E-Table 3. Numbers for injury causes in Guangdong, China between the Covid-19 Outbreak and Control Period in 2019 in different age groups in male and female population.**

| Sex group                     | Age group | Transport injuries | Poisonings | Falls | Fire, heat, and hot substances | Drowning | Self-harm           | Interpersonal violence | All-cause of injury |
|-------------------------------|-----------|--------------------|------------|-------|--------------------------------|----------|---------------------|------------------------|---------------------|
| <b>Control Period in 2019</b> |           |                    |            |       |                                |          |                     |                        |                     |
| Male                          | 0-14      | 113                | 22         | 63    | 13                             | 145      | 9<br>(10-14 years)  | 5                      | 511                 |
|                               | 15-59     | 1806               | 351        | 778   | 35                             | 378      | 1014                | 68                     | 5260                |
|                               | 60-69     | 520                | 40         | 344   | 14                             | 69       | 149                 | 5                      | 1312                |
|                               | 70-79     | 288                | 18         | 462   | 20                             | 45       | 89                  | 3                      | 1102                |
|                               | 80+       | 165                | 21         | 997   | 11                             | 34       | 61                  | 3                      | 1585                |
|                               | Total     | 2892               | 451        | 2644  | 94                             | 672      | 1322                | 85                     | 9770                |
| Female                        | 0-14      | 74                 | 27         | 47    | 5                              | 71       | 10<br>(10-14 years) | 11                     | 372                 |
|                               | 15-59     | 582                | 136        | 194   | 18                             | 138      | 498                 | 54                     | 1810                |
|                               | 60-69     | 197                | 15         | 125   | 2                              | 54       | 120                 | 8                      | 600                 |
|                               | 70-79     | 117                | 19         | 361   | 5                              | 45       | 79                  | 3                      | 763                 |
|                               | 80+       | 107                | 10         | 1831  | 10                             | 65       | 54                  | 1                      | 2684                |
|                               | Total     | 1078               | 207        | 2558  | 40                             | 373      | 761                 | 77                     | 6228                |
| General population            | 0-14      | 188                | 48         | 110   | 19                             | 216      | 20<br>(10-14 years) | 16                     | 883                 |
|                               | 15-59     | 2388               | 487        | 972   | 53                             | 516      | 1512                | 122                    | 7070                |
|                               | 60-69     | 717                | 56         | 469   | 16                             | 123      | 269                 | 13                     | 1912                |
|                               | 70-79     | 405                | 36         | 822   | 25                             | 91       | 168                 | 6                      | 1864                |
|                               | 80+       | 272                | 31         | 2828  | 22                             | 99       | 114                 | 4                      | 4269                |

|                                 |       | Total | 3970 | 659  | 5201 | 134 | 1045                | 2083 | 162   | 15998 |
|---------------------------------|-------|-------|------|------|------|-----|---------------------|------|-------|-------|
| <b>Covid-19 Outbreak period</b> |       |       |      |      |      |     |                     |      |       |       |
| Male                            | 0-14  | 77    | 13   | 55   | 4    | 118 | 22<br>(10-14 years) | 8    | 398   |       |
|                                 | 15-59 | 1239  | 317  | 649  | 18   | 255 | 770                 | 30   | 3904  |       |
|                                 | 60-69 | 408   | 51   | 304  | 10   | 46  | 146                 | 4    | 1131  |       |
|                                 | 70-79 | 271   | 15   | 432  | 10   | 23  | 94                  | 5    | 993   |       |
|                                 | 80+   | 135   | 18   | 997  | 14   | 27  | 32                  | 3    | 1511  |       |
|                                 | Total | 2130  | 414  | 2437 | 57   | 469 | 1066                | 51   | 7937  |       |
| Female                          | 0-14  | 50    | 18   | 46   | 5    | 33  | 23<br>(10-14 years) | 6    | 247   |       |
|                                 | 15-59 | 370   | 108  | 174  | 11   | 80  | 401                 | 28   | 1338  |       |
|                                 | 60-69 | 145   | 17   | 127  | 4    | 35  | 100                 | 5    | 502   |       |
|                                 | 70-79 | 106   | 13   | 344  | 7    | 42  | 82                  | 2    | 721   |       |
|                                 | 80+   | 70    | 20   | 1665 | 13   | 37  | 53                  | 1    | 2441  |       |
|                                 | Total | 741   | 177  | 2356 | 41   | 226 | 660                 | 43   | 5248  |       |
| General population              | 0-14  | 127   | 31   | 100  | 9    | 151 | 46<br>(10-14 years) | 14   | 644   |       |
|                                 | 15-59 | 1610  | 424  | 822  | 29   | 335 | 1171                | 59   | 5242  |       |
|                                 | 60-69 | 553   | 68   | 431  | 14   | 80  | 247                 | 9    | 1633  |       |
|                                 | 70-79 | 377   | 28   | 776  | 17   | 65  | 177                 | 7    | 1713  |       |
|                                 | 80+   | 205   | 39   | 2662 | 27   | 64  | 85                  | 4    | 3953  |       |
|                                 | Total | 2871  | 591  | 4792 | 97   | 695 | 1725                | 93   | 13186 |       |
